# Supplementary material for: Effect of salt selection and molar ratio in molten salt synthesis of single-crystalline LiNiO2
Source: Royal Society of Chemistry journal article supplement (doi:10.1039/d3ta07840j), 2024-01-01
Supplement: d3ta07840j1.pdf [file d3ta07840j1.pdf]

## Supporting Information

### **Effect of Salt Selection and Molar Ratio in Molten Salt Synthesis of Single-Crystalline LiNiO<sub>2</sub>**

Wessel van den Bergh,<sup>\*a</sup> Rui Yao,<sup>a</sup> Ruizhuo Zhang,<sup>a</sup> Aleksandr Kondrakov,<sup>a,b</sup> Jürgen Janek<sup>a,c</sup> and Torsten Brezesinski<sup>\*a</sup>

<sup>a</sup>Battery and Electrochemistry Laboratory (BELLA), Institute of Nanotechnology, Karlsruhe Institute of Technology (KIT), Herrmann-von-Helmholtz-Platz 1, 76344 Eggenstein-Leopoldshafen, Germany

<sup>b</sup>BASF SE, Carl-Bosch-Str. 38, 67056 Ludwigshafen, Germany

<sup>c</sup>Institute of Physical Chemistry & Center for Materials Research (ZfM/LaMa), Justus-Liebig-University Giessen, Heinrich-Buff-Ring 17, 35392 Giessen, Germany

\*Email: [wessel.j.vdb@gmail.com](mailto:wessel.j.vdb@gmail.com), [torsten.brezesinski@kit.edu](mailto:torsten.brezesinski@kit.edu)

## Experimental Methods

*Sample Preparation:* LNO was prepared from a Ni(OH)<sub>2</sub> precursor ( $d_{50} = 4 \mu\text{m}$ , BASF SE) and LiOH·H<sub>2</sub>O ( $d_{50} = 4 \mu\text{m}$ , BASF SE) with salts of varying proportions and molar ratios (see **Table S1**), with the salts being CsCl (Merck KGaA,  $\geq 99.5\%$ ), KCl (Merck KGaA,  $\geq 99.5\%$ ), K<sub>2</sub>SO<sub>4</sub> (Merck KGaA,  $\geq 99.0\%$ ), NaCl (Merck KGaA, 99.99%), and Na<sub>2</sub>SO<sub>4</sub> (Merck KGaA,  $\geq 98.5\%$ ). All samples were dried at 110 °C for >10 h before being stored in an Ar glovebox. Reagents consisting of 1.70 g of Ni(OH)<sub>2</sub> and 0.846 g LiOH·H<sub>2</sub>O (1.0:1.1 mol. ratio of Ni:Li) along with the chosen salts (1 or 4 mol. eq. to Ni) were mixed via mortar and pestle inside an Ar glovebox until a uniformly light green colored powder was observed (elimination of clumps of white powder, LiOH·H<sub>2</sub>O). The powder mixture was loaded into an alumina crucible sized either approx. 6 cm × 2.5 cm (half standard) or approx. 9 cm × 2.5 cm (standard) depending on the molar salt ratio used. Powder was evenly distributed and a microspatula was used to cut aeration grooves into the powder to minimize geometric variation in oxidation of precursor. The crucible was loaded into an externally calibrated (see **Figure S41**) tube furnace (Nabertherm, RHTC 80-230/15) equipped with a custom-made quartz glass tube containing a glass line for preheating O<sub>2</sub>. Samples were individually calcined at 520 °C for 4 h followed by 880 °C for 12 h with ramping and cooling rates of 5 °C/min and 25 L/h of O<sub>2</sub>. Samples were then washed. First, grinding the “frozen block” of material into a powder via mortar and pestle. Next, powder was suspended in 10 mL of DI water for 1-3 min with agitation a total three times (washes), followed by 13 mL of ethanol, then 13 mL of acetone; each wash came with a centrifugation at 3000 rpm for 2 min and a decantation. Once all the washes were completed, the samples were dried with flowing Ar gas to remove majority residual solvent, followed by vacuum drying overnight at room temperature.

*SEM Analysis:* Samples for SEM were prepared as is after preparation, loaded onto conductive carbon tape and measured on a LEO-1530 (Carl Zeiss AG) at a working distance of approx. 3.5 mm at 10 kV with an In-Lens detector. Sample size was analyzed using ImageJ 1.53t software (National Institute of Health) averaging the Feret diameter of the particle along its longest axis and a second, perpendicular Feret diameter measurement at the midpoint of the first (distance was calibrated via in-image scale bar, see **Figure S1**).

*XRD Analysis:* Samples were prepared by first sieving through a 90  $\mu\text{m}$  stainless steel mesh to ease packing of a 0.3 mm diameter capillary tube. XRD patterns were collected using a regularly calibrated (LaB<sub>6</sub>, NIST 660c) STADI P (STOE) diffractometer in Debye-Scherrer geometry with monochromatic Mo K-alpha1 source ( $\lambda = 0.7093 \text{ \AA}$ , 50 kV, 40 mA, polariz. = 0.9528) and a Mythen 1K detector (Dectris). Data were analyzed using GSAS II version 5260 (Argonne National Lab) along a sequential analysis scheme shown below (see **Scheme S1**). Complete set of XRD patterns can be found in **Figures S20-S36**, and Rietveld refinement values for all samples prepared are given in **Table S3**.

*Electrochemical Testing:* The KCl(-) sample after washing and post-annealing at 700 °C for 3 h (with ramping and cooling rates of 5 °C/min and 25 L/h of O<sub>2</sub>) was electrochemically tested in Li-ion battery (LIB) half-cells (see **Figure S42**). To this end, the material was first mixed with polyvinylidene difluoride binder (PVDF, Solef 5130, Solvay) and Super C65 carbon additive (TIMCAL Ltd.) in N-methyl-pyrrolidone (NMP) in a ratio of 94:3:3 by weight, and then cast onto 0.03 mm thick Al foil using an Erichsen Coatmaster 510 applicator, resulting in an areal loading of  $\sim 10 \text{ mg/cm}^2$ . We note that all mixing steps were carried out under ambient conditions in a dry room, which can be expected to have some effect on cell performance. The as-prepared cathode tape was dried under vacuum at 120 °C overnight, calendared at 14 N/mm (Sumet Messtechnik), and finally cut into circular 13 mm diameter discs. Coin cells were assembled using a glass fiber GF/D separator, LP57 electrolyte [1 M LiPF<sub>6</sub> in a 3:7 by weight of ethylene carbonate (EC) and ethyl methyl carbonate (EMC)], and a Li-metal anode in an Ar glovebox.

**Table S1.** Complete list of samples prepared with molar ratios of salt to Ni used and fractions of salt used in the mixtures.

| Sample ID    | Salt Mol. Ratio (X:Ni) | CsCl | KCl | K <sub>2</sub> SO <sub>4</sub> | NaCl | Na <sub>2</sub> SO <sub>4</sub> |
|--------------|------------------------|------|-----|--------------------------------|------|---------------------------------|
| CsCl(-)      | 1.0                    | 1.0  |     |                                |      |                                 |
| CsCl(+)      | 4.0                    | 1.0  |     |                                |      |                                 |
| CsCl-KCl(-)  | 1.0                    | 0.5  | 0.5 |                                |      |                                 |
| CsCl-KCl(+)  | 4.0                    | 0.5  | 0.5 |                                |      |                                 |
| CsCl-NaCl(-) | 1.0                    | 0.5  |     |                                | 0.5  |                                 |
| CsCl-NaCl(+) | 4.0                    | 0.5  |     |                                | 0.5  |                                 |
| KCl(-)       | 1.0                    |      | 1.0 |                                |      |                                 |
| KCl(+)       | 4.0                    |      | 1.0 |                                |      |                                 |

|                                          |     |  |      |      |      |      |
|------------------------------------------|-----|--|------|------|------|------|
| KCl-K <sub>2</sub> SO <sub>4</sub> (-)   | 1.0 |  | 0.75 | 0.25 |      |      |
| KCl-K <sub>2</sub> SO <sub>4</sub> (+)   | 4.0 |  | 0.75 | 0.25 |      |      |
| KCl-NaCl(-)                              | 1.0 |  | 0.5  |      | 0.5  |      |
| KCl-NaCl(+)                              | 4.0 |  | 0.5  |      | 0.5  |      |
| NaCl(-)                                  | 1.0 |  |      |      | 1.0  |      |
| NaCl(+)                                  | 4.0 |  |      |      | 1.0  |      |
| NaCl-Na <sub>2</sub> SO <sub>4</sub> (-) | 1.0 |  |      |      | 0.54 | 0.46 |
| NaCl-Na <sub>2</sub> SO <sub>4</sub> (+) | 4.0 |  |      |      | 0.54 | 0.46 |

**Table S2.** Complete list of samples prepared with response values.

| Sample ID                                | Avg. Particle size $\pm$ stddev. ( $\mu\text{m}$ ) | $d_{10}$ Particle Size ( $\mu\text{m}$ ) | $d_{50}$ Particle Size ( $\mu\text{m}$ ) | $d_{90}$ Particle Size ( $\mu\text{m}$ ) | Particle Size Span | Ni <sub>Li</sub> (%) |
|------------------------------------------|----------------------------------------------------|------------------------------------------|------------------------------------------|------------------------------------------|--------------------|----------------------|
| CsCl(-)                                  | 3.33 $\pm$ 1.16                                    | 1.97035                                  | 3.17                                     | 4.95795                                  | 0.943726           | 6.93                 |
| CsCl(+)                                  | 4.00 $\pm$ 1.39                                    | 2.67585                                  | 3.76                                     | 6.13645                                  | 0.920311           | 7.56                 |
| CsCl-KCl(-)                              | 3.88 $\pm$ 1.25                                    | 2.492                                    | 3.66                                     | 5.8725                                   | 0.923886           | 4.98                 |
| CsCl-KCl(+)                              | 4.72 $\pm$ 1.77                                    | 3.1468                                   | 4.31                                     | 6.8064                                   | 0.849292           | 6.04                 |
| CsCl-NaCl(-)                             | 6.17 $\pm$ 3.36                                    | 2.4681                                   | 5.77                                     | 10.0892                                  | 1.320471           | 7.24                 |
| CsCl-NaCl(+)                             | 10.1 $\pm$ 2.81                                    | 6.56425                                  | 9.96                                     | 13.66795                                 | 0.713205           | 6.10                 |
| KCl(-)                                   | 3.78 $\pm$ 1.27                                    | 2.504                                    | 3.53                                     | 5.255                                    | 0.779651           | 4.80                 |
| KCl(+)                                   | 5.89 $\pm$ 2.27                                    | 3.5376                                   | 5.29                                     | 9.00225                                  | 1.032332           | 5.71                 |
| KCl-K <sub>2</sub> SO <sub>4</sub> (-)   | 5.14 $\pm$ 1.61                                    | 3.52575                                  | 4.79                                     | 7.42155                                  | 0.814127           | 7.08                 |
| KCl-K <sub>2</sub> SO <sub>4</sub> (+)   | 8.18 $\pm$ 3.48                                    | 4.6895                                   | 7.69                                     | 12.6207                                  | 1.031835           | 7.43                 |
| KCl-NaCl(-)                              | 5.04 $\pm$ 2.59                                    | 2.847                                    | 4.04                                     | 8.3495                                   | 1.362848           | 5.47                 |
| KCl-NaCl(+)                              | 9.01 $\pm$ 2.91                                    | 5.514                                    | 8.63                                     | 13.0186                                  | 0.869544           | 7.40                 |
| NaCl(-)                                  | 11.7 $\pm$ 3.51                                    | 7.63725                                  | 11.4                                     | 16.7028                                  | 0.79741            | 5.66                 |
| NaCl(+)                                  | 14.2 $\pm$ 4.11                                    | 9.16965                                  | 13.4                                     | 20.82415                                 | 0.870275           | 5.44                 |
| NaCl-Na <sub>2</sub> SO <sub>4</sub> (-) | 7.75 $\pm$ 4.33                                    | 3.2711                                   | 6.72                                     | 14.2407                                  | 1.632867           | 7.12                 |
| NaCl-Na <sub>2</sub> SO <sub>4</sub> (+) | 4.55 $\pm$ 1.63                                    | 2.77325                                  | 4.09                                     | 6.57575                                  | 0.929025           | 16.2                 |

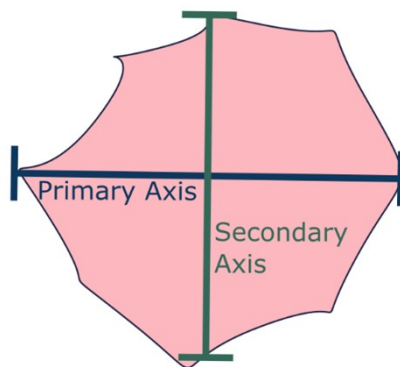

**Figure S1.** A representation of how particles are measured for size, as described in the SEM section of the Experimental.

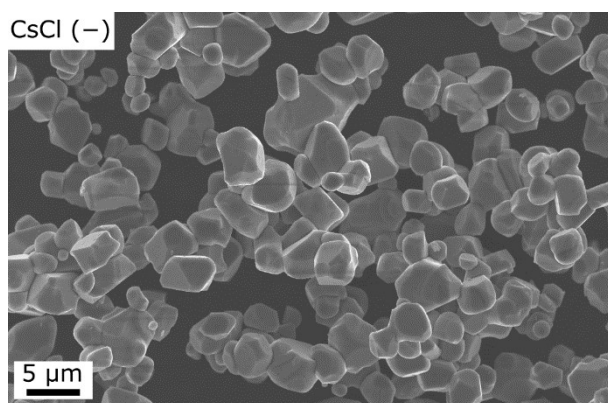

**Figure S2.** SEM of CsCl(-) sample.

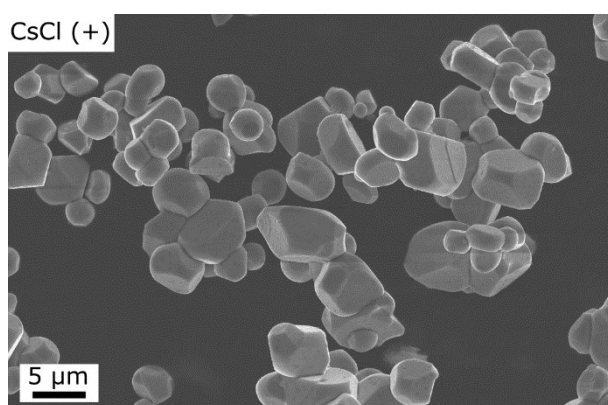

**Figure S3.** SEM of CsCl(+) sample.

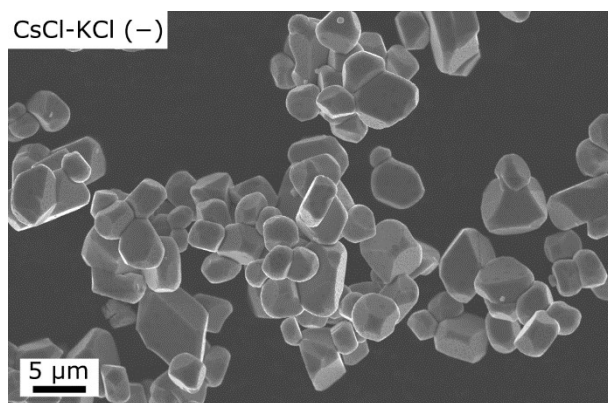

**Figure S4.** SEM of CsCl-KCl(-) sample.

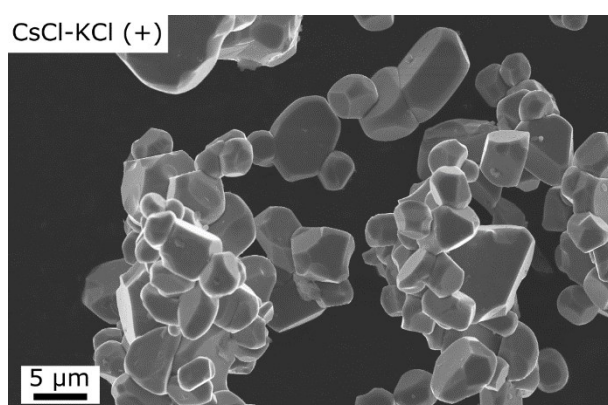

**Figure S5.** SEM of CsCl-KCl(+) sample.

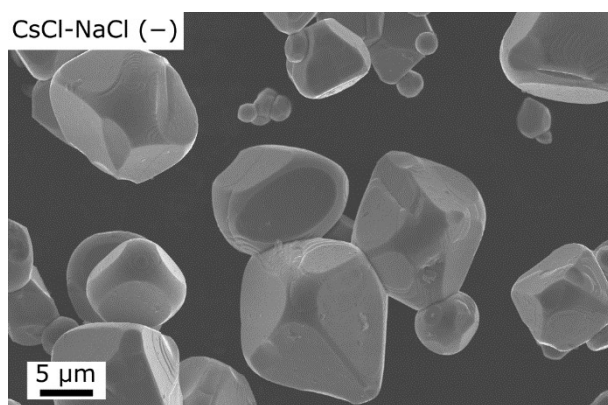

**Figure S6.** SEM of CsCl-NaCl(-) sample.

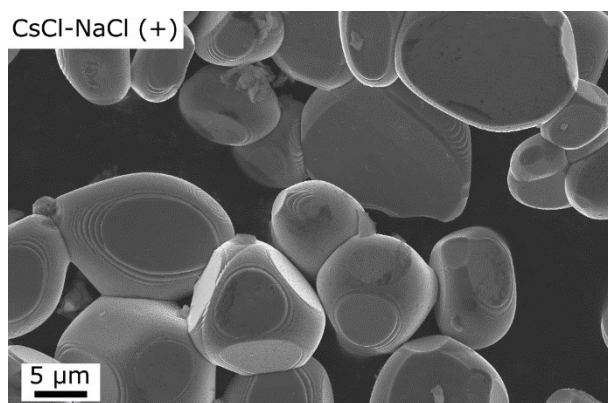

**Figure S7.** SEM of CsCl-NaCl(+) sample.

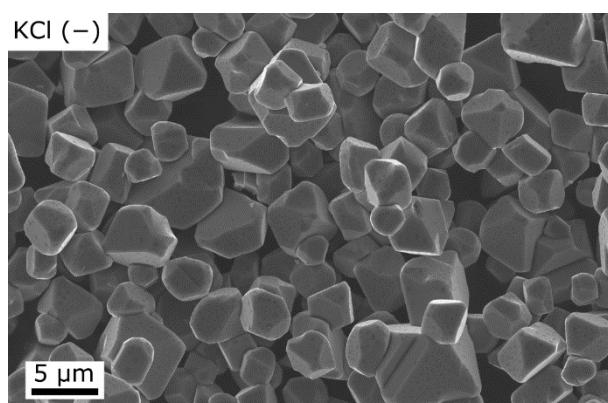

**Figure S8.** SEM of KCl(-) sample.

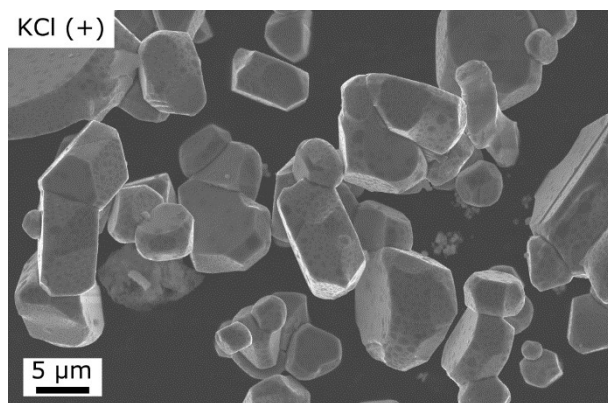

**Figure S9.** SEM of KCl(+) sample.

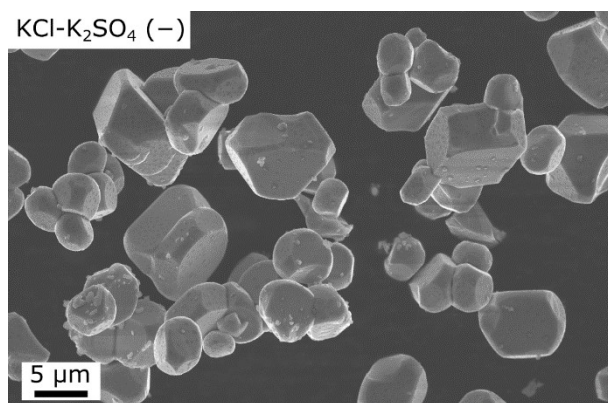

**Figure S10.** SEM of KCl-K<sub>2</sub>SO<sub>4</sub>(-) sample.

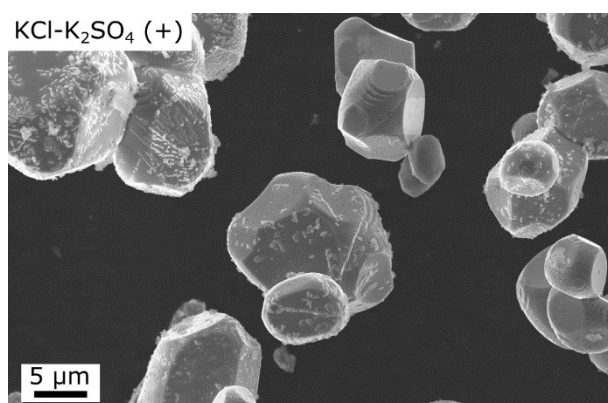

**Figure S11.** SEM of KCl-K<sub>2</sub>SO<sub>4</sub>(+) sample.

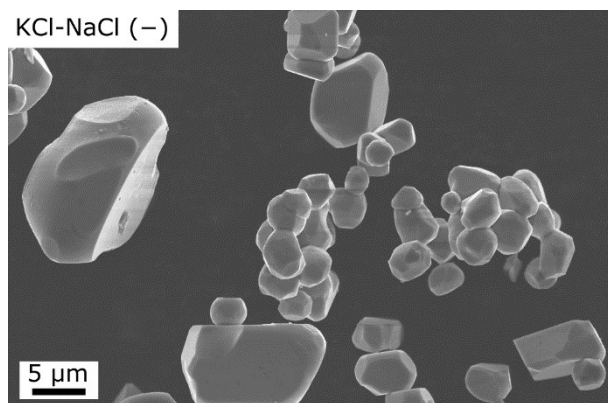

**Figure S12.** SEM of KCl-NaCl(-) sample.



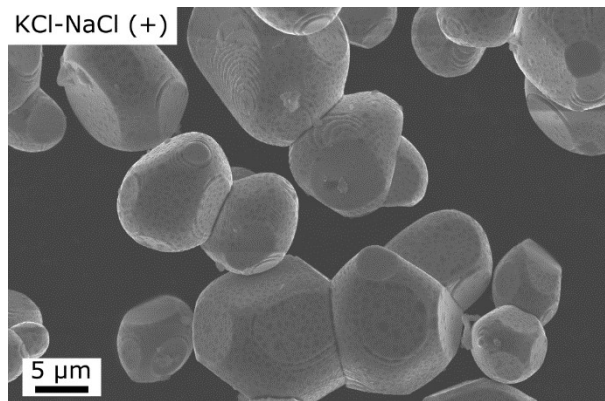

**Figure S13.** SEM of KCl-NaCl(+) sample.

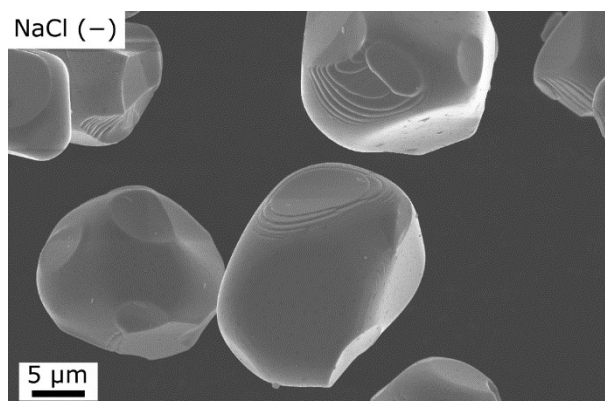

**Figure S14.** SEM of NaCl(-) sample.

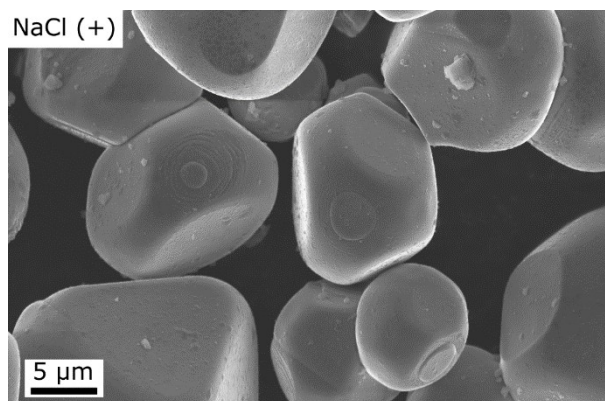

**Figure S15.** SEM of NaCl(+) sample.

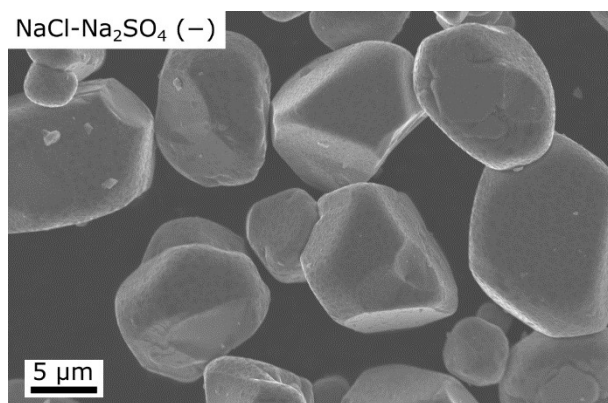

**Figure S16.** SEM of NaCl-Na<sub>2</sub>SO<sub>4</sub>(-) sample.

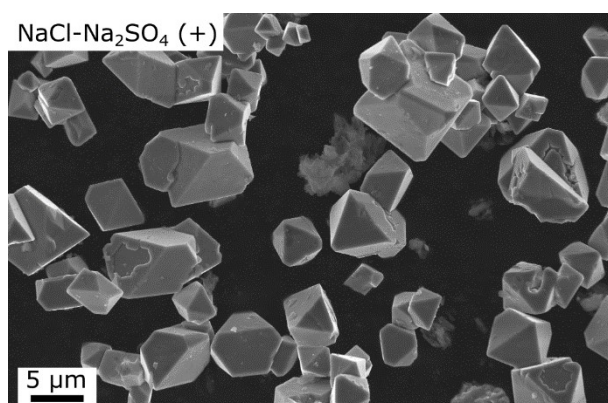

**Figure S17.** SEM of NaCl-Na<sub>2</sub>SO<sub>4</sub>(+) sample.

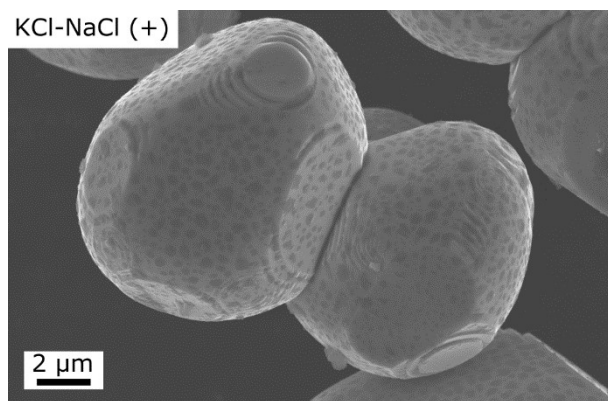

**Figure S18.** SEM of KCl-NaCl(+) sample with a zoomed in examination of the terracing found on the particles.

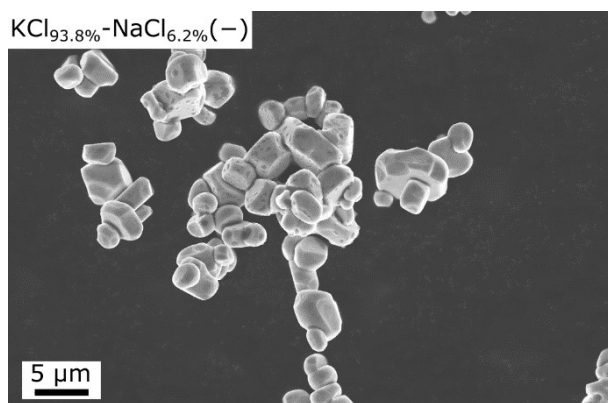

**Figure S19.** SEM of a tailor-made sample with 93.8% KCl and 6.2% NaCl at 1.0 mol. eq. to Ni.

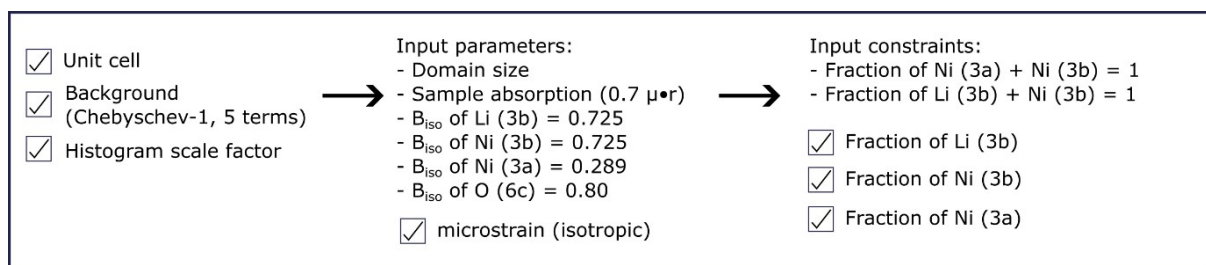

**Scheme S1.** The sequence of Rietveld refinement performed with GSAS II. Each checked parameter was enabled through further refinements. Input parameters and constraints were held constant.

**Table S3.** Rietveld refinement values for all samples prepared.

| Sample ID                              | $R_{wp}$ (%) | GoF  | $a$ (Å) | $c$ (Å) | $V$ (Å <sup>3</sup> ) | Microstrain | Ni <sub>Li</sub> (%) |
|----------------------------------------|--------------|------|---------|---------|-----------------------|-------------|----------------------|
| CsCl(-)                                | 19.05        | 1.19 | 2.88    | 14.21   | 102.42                | 1362.00     | 6.93                 |
| CsCl(+)                                | 19.35        | 1.20 | 2.88    | 14.21   | 102.40                | 448.80      | 7.56                 |
| CsCl-KCl(-)                            | 22.40        | 1.31 | 2.88    | 14.21   | 102.37                | 565.20      | 4.98                 |
| CsCl-KCl(+)                            | 19.36        | 1.20 | 2.89    | 14.21   | 102.44                | 444.70      | 6.04                 |
| CsCl-NaCl(-)                           | 25.50        | 1.33 | 2.89    | 14.22   | 102.71                | 742.70      | 7.24                 |
| CsCl-NaCl(+)                           | 21.49        | 1.31 | 2.89    | 14.21   | 102.54                | 469.50      | 6.10                 |
| KCl(-)                                 | 22.09        | 1.17 | 2.88    | 14.21   | 102.33                | 1322.20     | 4.80                 |
| KCl(+)                                 | 20.31        | 1.28 | 2.89    | 14.21   | 102.44                | 344.30      | 5.71                 |
| KCl-K <sub>2</sub> SO <sub>4</sub> (-) | 20.81        | 1.31 | 2.89    | 14.21   | 102.46                | 469.50      | 7.08                 |

|                                          |       |      |      |       |        |         |      |
|------------------------------------------|-------|------|------|-------|--------|---------|------|
| KCl-K <sub>2</sub> SO <sub>4</sub> (+)   | 20.17 | 1.25 | 2.89 | 14.21 | 102.49 | 364.70  | 7.43 |
| KCl-NaCl(-)                              | 21.64 | 1.19 | 2.88 | 14.21 | 102.41 | 411.30  | 5.47 |
| KCl-NaCl(+)                              | 19.54 | 1.22 | 2.89 | 14.22 | 102.53 | 334.30  | 7.40 |
| NaCl(-)                                  | 19.87 | 1.15 | 2.88 | 14.21 | 102.44 | 77.50   | 5.66 |
| NaCl(+)                                  | 23.15 | 1.19 | 2.89 | 14.22 | 102.54 | 1104.50 | 5.44 |
| NaCl-Na <sub>2</sub> SO <sub>4</sub> (-) | 19.44 | 1.11 | 2.89 | 14.22 | 102.59 | 696.20  | 7.12 |
| NaCl-Na <sub>2</sub> SO <sub>4</sub> (+) | 26.29 | 1.52 | 2.90 | 14.24 | 103.42 | 2378.00 | 16.2 |

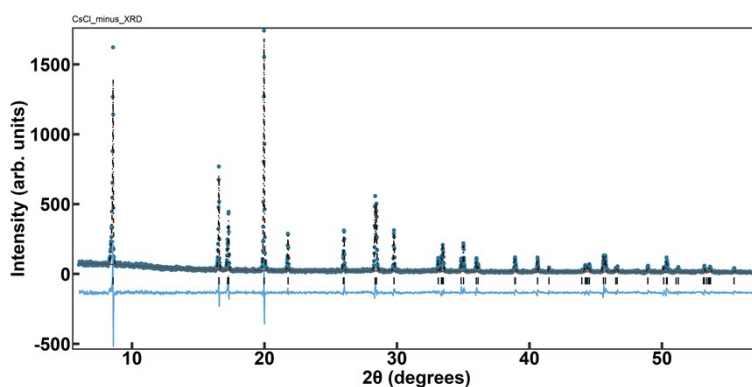

**Figure S20.** Rietveld refined XRD pattern of CsCl(-) sample.

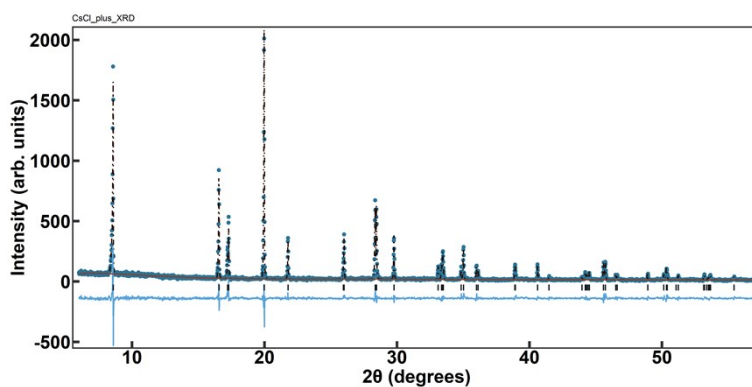

**Figure S21.** Rietveld refined XRD pattern of CsCl(+) sample.

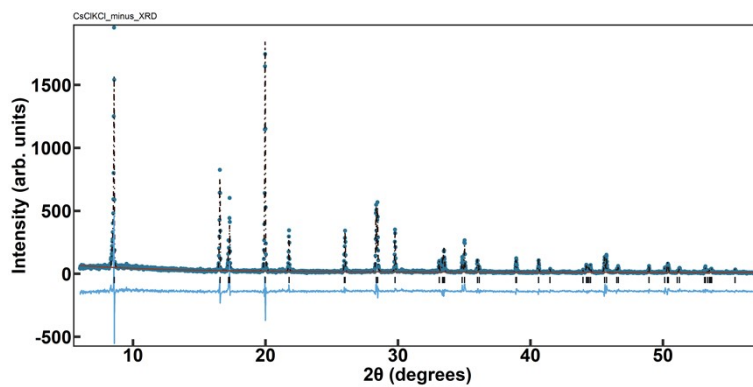

**Figure S22.** Rietveld refined XRD pattern of CsCl-KCl(-) sample.

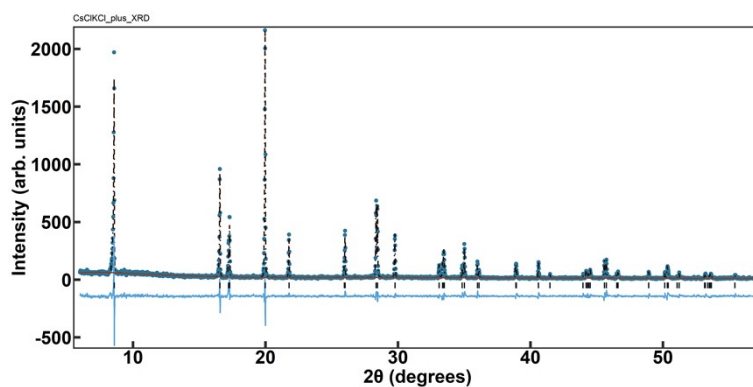

**Figure S23.** Rietveld refined XRD pattern of CsCl-KCl(+) sample.

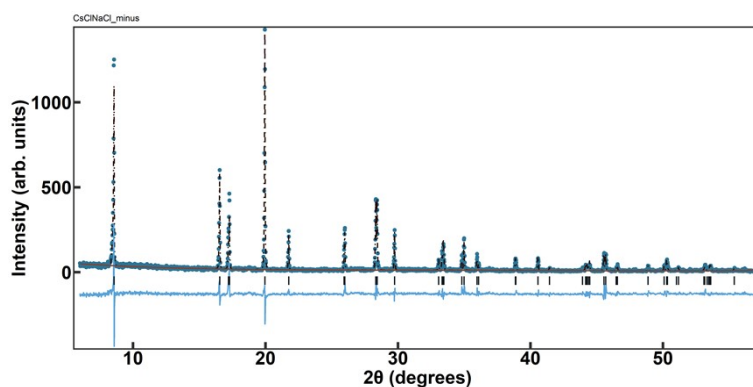

**Figure S24.** Rietveld refined XRD pattern of CsCl-NaCl(-) sample.

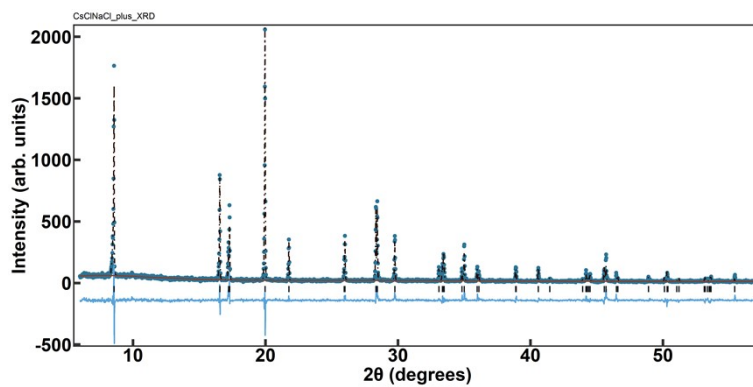

**Figure S25.** Rietveld refined XRD pattern of CsCl-NaCl(+) sample.

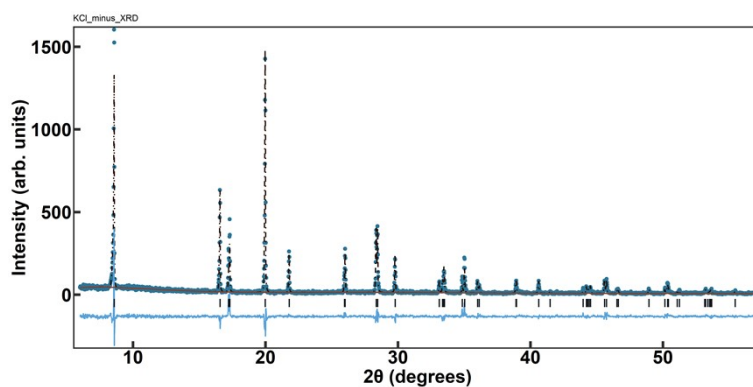

**Figure S26.** Rietveld refined XRD pattern of KCl(-) sample.

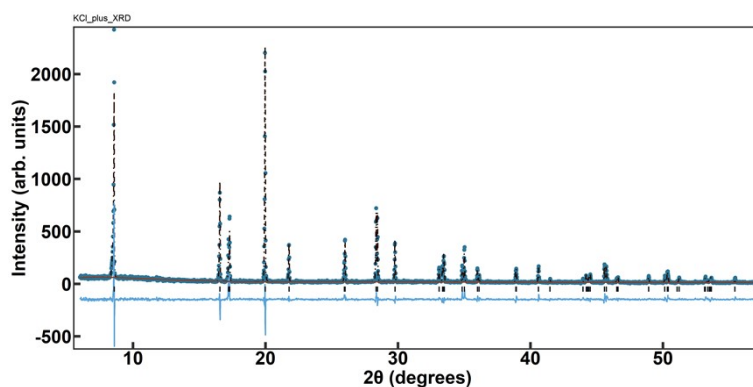

**Figure S27.** Rietveld refined XRD pattern of KCl(+) sample.

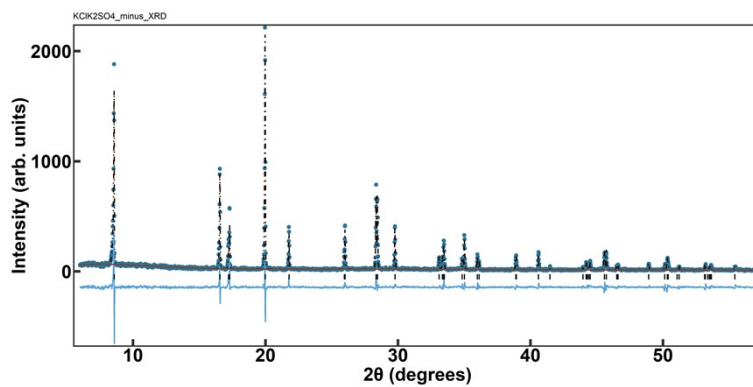

**Figure S28.** Rietveld refined XRD pattern of KCl-K<sub>2</sub>SO<sub>4</sub>(-) sample.

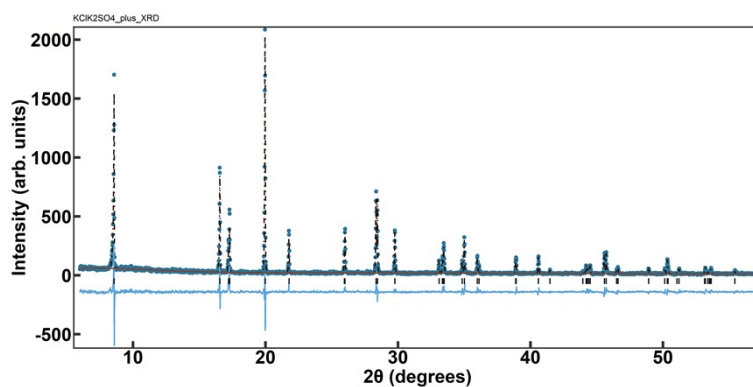

**Figure S29.** Rietveld refined XRD pattern of KCl-K<sub>2</sub>SO<sub>4</sub>(+) sample.

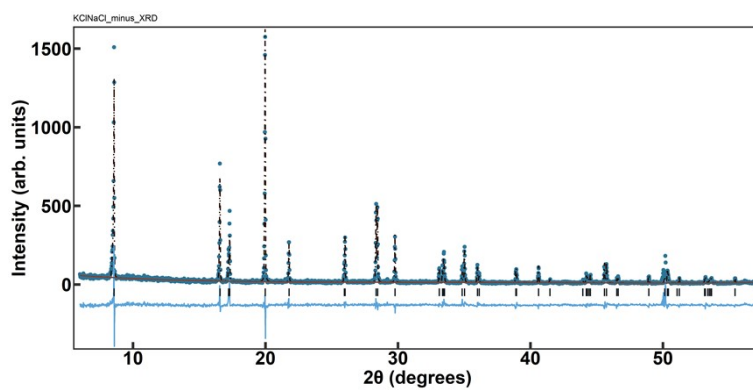

**Figure S30.** Rietveld refined XRD pattern of KCl-NaCl(-) sample.

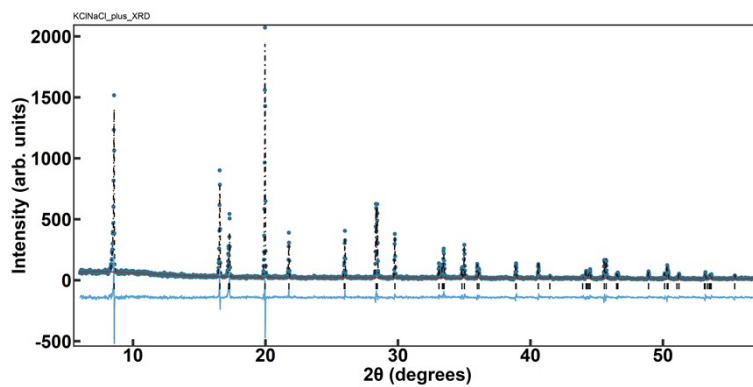

**Figure S31.** Rietveld refined XRD pattern of KCl-NaCl(+) sample.

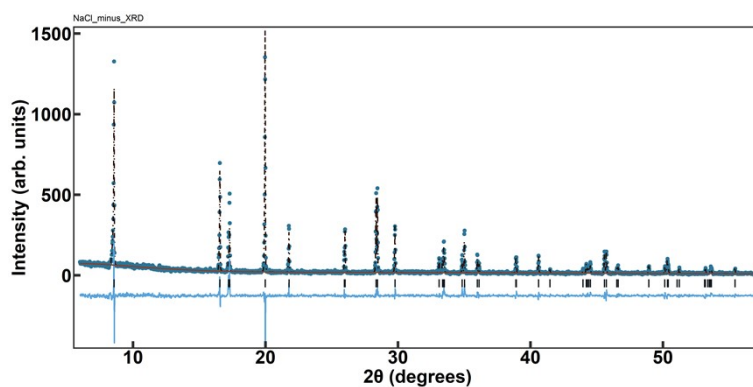

**Figure S32.** Rietveld refined XRD pattern of NaCl(-) sample.

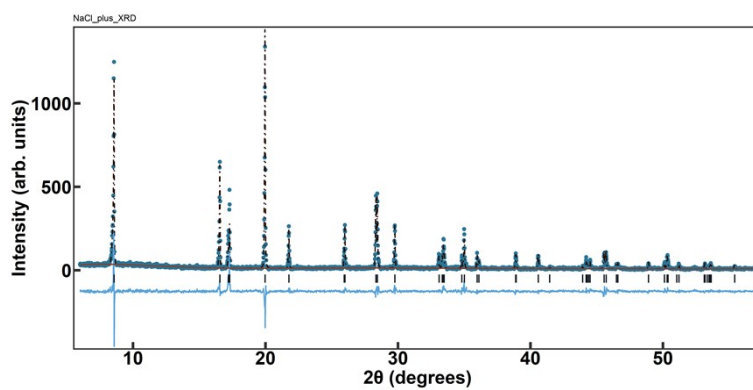

**Figure S33.** Rietveld refined XRD pattern of NaCl(+) sample.



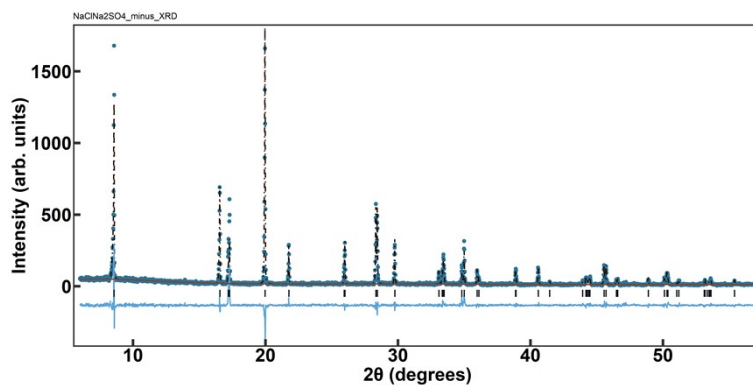

**Figure S34.** Rietveld refined XRD pattern of NaCl-Na<sub>2</sub>SO<sub>4</sub>(-) sample.

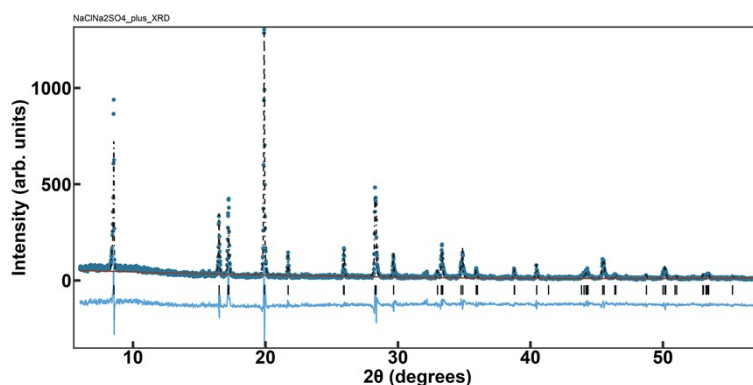

**Figure S35.** Rietveld refined XRD pattern of NaCl-Na<sub>2</sub>SO<sub>4</sub>(+) sample.

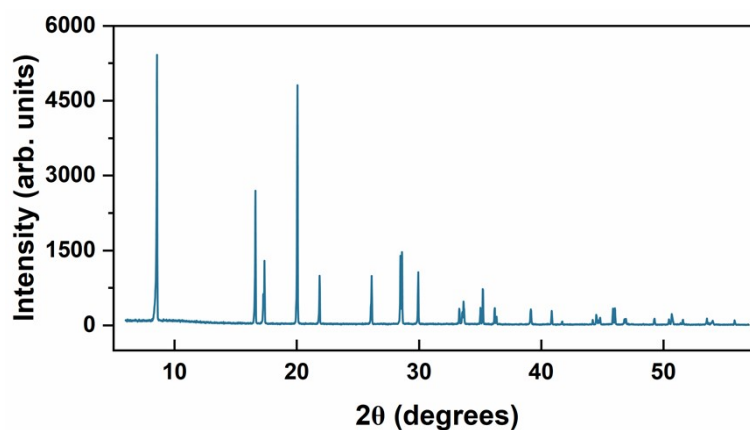

**Figure S36.** XRD pattern of tailor-made sample with 93.8% KCl and 6.2% NaCl at 1.0 mol. eq. to Ni.

Equation used to calculate particle size span, as shown in **Table S2** and **Figure S37**:

$$Span = \frac{d_{90} - d_{10}}{d_{50}}, \quad \text{Eqn. S1}$$

where  $d_i$  refers to particle sizes at different percentiles of the population.

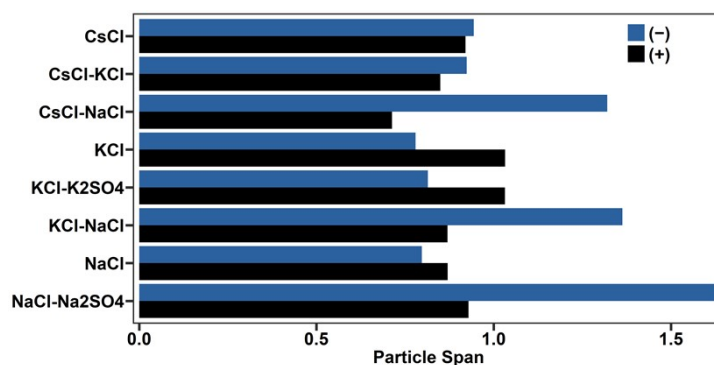

**Figure S37.** Bar plot of particle size span for all samples prepared.

**Table S4.** Estimates of particle span for statistically significant factors accompanied by their standard error and *t*-values.

| Term                                   | Estimate | Std. Error | <i>t</i> -Ratio | Prob >   <i>t</i> |
|----------------------------------------|----------|------------|-----------------|-------------------|
| NaCl <sup>1</sup>                      | 0.93422  | 0.13546    | 6.85            | >0.0001           |
| KCl <sup>1</sup>                       | 1.0751   | 0.11592    | 9.27            | >0.0001           |
| CsCl <sup>1</sup>                      | 0.92092  | 0.13545    | 6.75            | >0.0001           |
| NaCl × Na <sub>2</sub> SO <sub>4</sub> | 4.5426   | 0.97734    | 4.65            | 0.0007            |

<sup>1</sup>Due to the nature of a mixture design, the contribution of these factors is convolved with other main effect mixture factors.

Following equations are based upon the estimates of particle span found in **Table S2**:

$$Span = \beta_{NaCl}f_{NaCl} + \beta_{KCl}f_{KCl} + \beta_{CsCl}f_{CsCl} + \beta_{\{NaCl \times Na_2SO_4\}}f_{NaCl}f_{Na_2SO_4}, \quad 1 = \sum_{i=1}^k f_i \quad \text{Eqn. S2}$$

and

$$Span = \beta_{NaCl}f_{NaCl} + \beta_{KCl}(1 - f_{NaCl}), \quad \text{Eqn. S3}$$

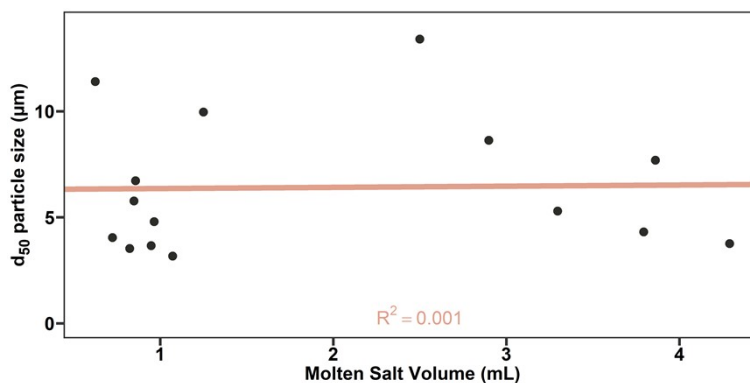

**Figure S38.** Linear regression between molten salt volume estimated at 880 °C and  $d_{50}$  particle size.

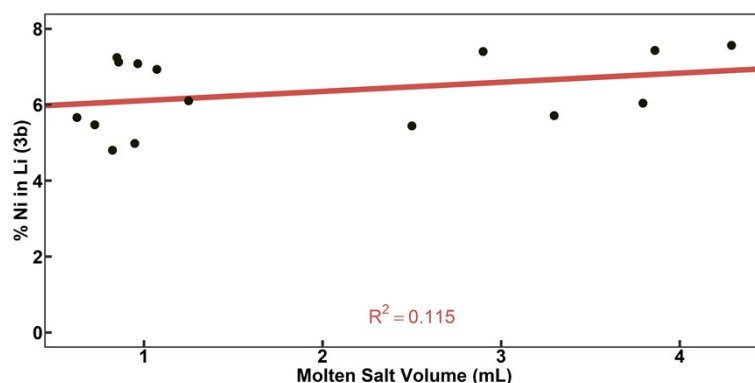

**Figure S39.** Linear regression between molten salt volume estimated at 880 °C and  $Ni_{Li}^{\bullet}$  defect content.

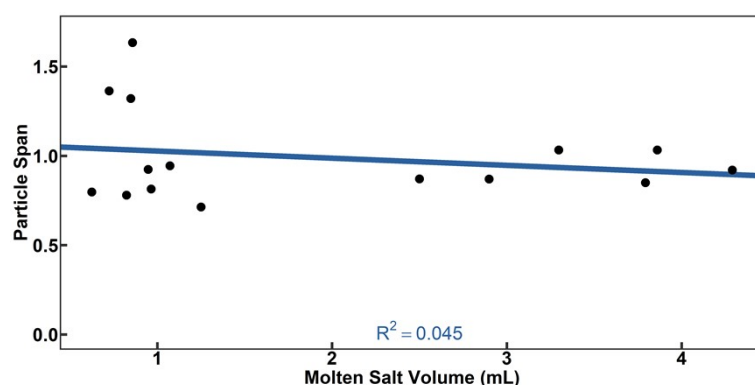

**Figure S40.** Linear regression between molten salt volume estimated at 880 °C and particle size span.

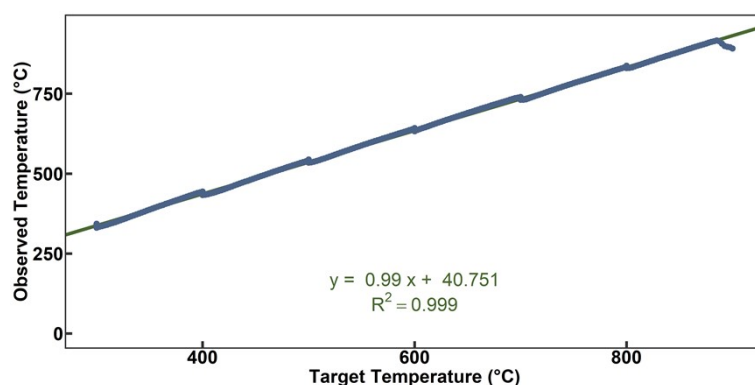

**Figure S41.** Calibration curve of the furnace used with an OMEGA KHXL-IM60U-RSC-600 thermocouple. Calibration procedure was 30 min holds at 100 °C intervals above 300 °C with 5 °C/min ramps in between each step.

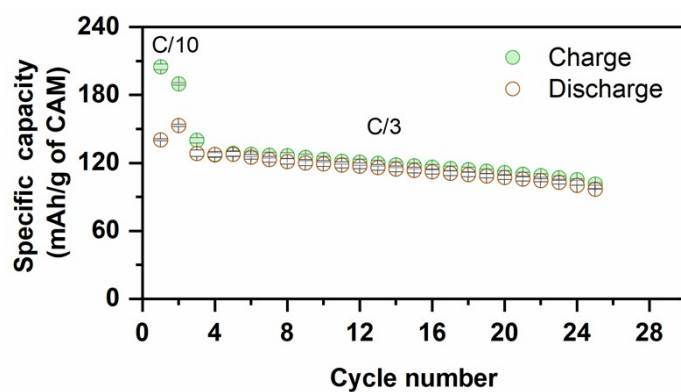

**Figure S42.** Cycling performance of LIB half-cells using the KCl(-) sample at 25 °C in the potential window of 3.0-4.3 V vs. Li<sup>+</sup>/Li. The error bars represent the standard deviation from two independent cells.
